# Supplementary material for: Synthesis and LCST-type phase behavior of water-soluble polypeptide with Y-shaped and charged side-chains
Source: Royal Society of Chemistry journal article supplement (doi:10.1039/c5py01991e), 2016-01-01
Supplement: c5py01991e1.pdf [file c5py01991e1.pdf]

Supporting Information

**Synthesis and LCST-Type Phase Behavior of Water-Soluble Polypeptide with  
Y-Shaped and Charged Side-Chains**

Yanzhi Xu, Mengxiang Zhu, Minjie Li, Ying Ling, and Haoyu Tang\*

*Key Laboratory of Polymeric Materials and Application Technology of Hunan  
Province, Key Laboratory of Advanced Functional Polymer Materials of Colleges  
and Universities of Hunan Province, College of Chemistry, Xiangtan University,  
Xiangtan, Hunan, 411105, China*

*Correspondence to:* Haoyu Tang (Email: [htang@xtu.edu.cn](mailto:htang@xtu.edu.cn))

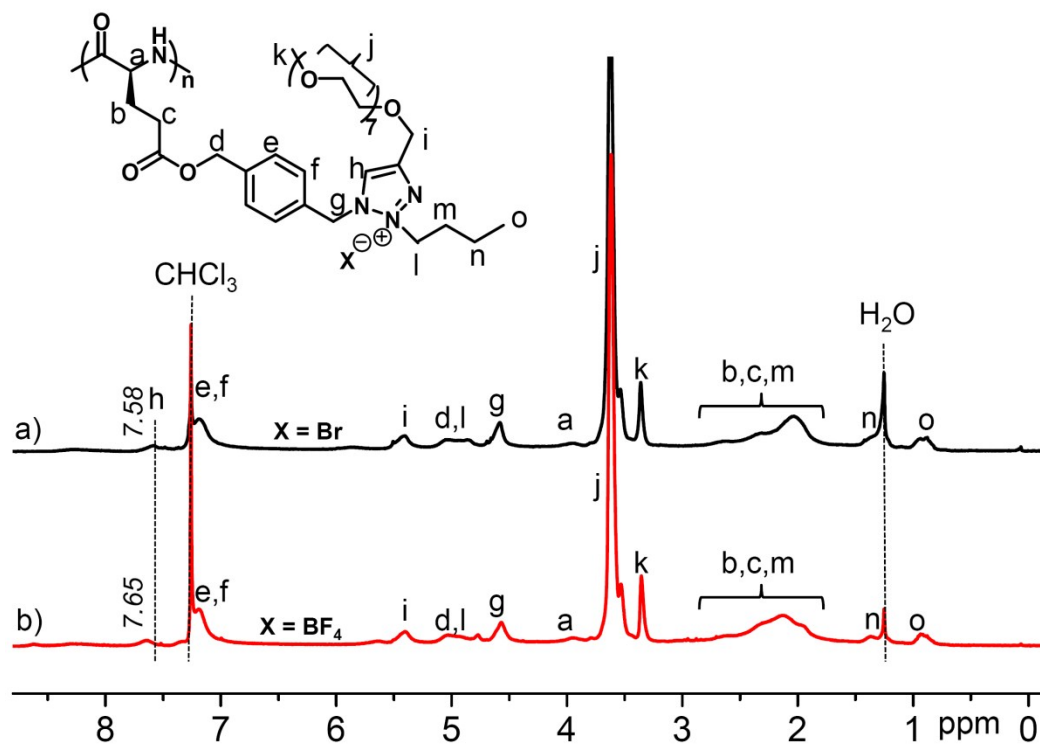

**Figure S1.**  $^1\text{H}$  NMR spectra of PMBLG-OEG<sub>7</sub>/C<sub>4</sub>-X (X = Br or BF<sub>4</sub>) in CDCl<sub>3</sub>.

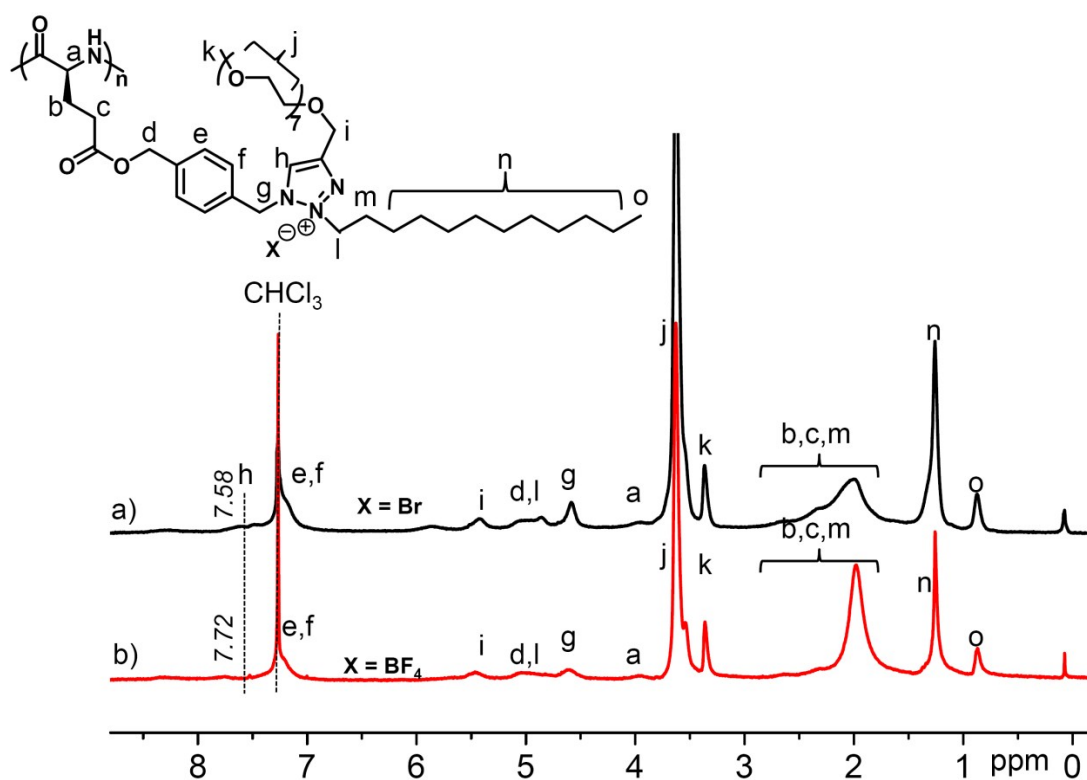

**Figure S2.**  $^1\text{H}$  NMR spectra of PMBLG-OEG<sub>7</sub>/C<sub>12</sub>-X (X = Br or BF<sub>4</sub>) in CDCl<sub>3</sub>.

Table S1. Elemental analysis results of PMBLG-OEG<sub>7</sub>/C<sub>m</sub>-BF<sub>4</sub> samples.

| Samples                                                  | C (%) |       | H (%) |       | N (%) |       | O (%) |       |
|----------------------------------------------------------|-------|-------|-------|-------|-------|-------|-------|-------|
|                                                          | Calcd | Found | Calcd | Found | Calcd | Found | Calcd | Found |
| PMBLG-OEG <sub>7</sub> /C <sub>4</sub> -BF <sub>4</sub>  | 52.77 | 52.53 | 7.21  | 7.25  | 7.03  | 7.07  | 22.09 | 22.33 |
| PMBLG-OEG <sub>7</sub> /C <sub>6</sub> -BF <sub>4</sub>  | 53.89 | 53.69 | 7.46  | 7.49  | 6.79  | 6.83  | 21.34 | 21.75 |
| PMBLG-OEG <sub>7</sub> /C <sub>12</sub> -BF <sub>4</sub> | 56.82 | 57.60 | 8.10  | 8.14  | 6.16  | 6.18  | 19.36 | 19.67 |

Table S2. Solubility characteristics of PMBLG-OEG<sub>7</sub> and PMBLG-OEG<sub>7</sub>/C<sub>m</sub>-X samples in various solvents.

| Solvents         | PMBLG<br>-OEG <sub>7</sub> | PMBLG-OEG <sub>7</sub> /C <sub>m</sub> -Br |       |        | PMBLG-OEG <sub>7</sub> /C <sub>m</sub> -BF <sub>4</sub> |       |        |
|------------------|----------------------------|--------------------------------------------|-------|--------|---------------------------------------------------------|-------|--------|
|                  |                            | m = 4                                      | m = 6 | m = 12 | m = 4                                                   | m = 6 | m = 12 |
| DMSO             | S                          | S                                          | S     | S      | S                                                       | S     | S      |
| DMF              | S                          | S                                          | S     | S      | S                                                       | S     | S      |
| H <sub>2</sub> O | L                          | S                                          | S     | S      | L                                                       | L     | L      |
| MeOH             | S                          | S                                          | S     | S      | S                                                       | S     | S      |
| EtOH             | S                          | S                                          | S     | S      | S                                                       | S     | S      |
| THF              | S                          | I                                          | I     | I      | I                                                       | I     | I      |
| EAc              | I                          | I                                          | I     | I      | I                                                       | I     | I      |
| DEE              | I                          | I                                          | I     | I      | I                                                       | I     | I      |
| TCM              | S                          | S                                          | S     | S      | S                                                       | S     | S      |
| DCM              | S                          | S                                          | S     | S      | S                                                       | S     | S      |
| Hexane           | I                          | I                                          | I     | I      | I                                                       | I     | I      |

DMSO = dimethyl sulphoxide; DMF = *N,N*-dimethylformamide; MeOH = methanol; EtOH = ethanol; THF = tetrahydrofuran; EAc = ethyl acetate; DEE = diethyl ether; TCM = trichloromethane; DCM = dichloromethane; S = soluble; I = insoluble; L = LCST-type phase transition (concentration = 10 mg·mL<sup>-1</sup>).

Table S3. Mean residual ellipticity ( $[\theta]_{222}$ ) and fractional helicity ( $f_H$ ) of PMBLG-OEG<sub>7</sub> and PMBLG-OEG<sub>7</sub>/C<sub>m</sub>-X samples in DI-H<sub>2</sub>O (0.05 mg·mL<sup>-1</sup>).

| Name                                                     | $[\theta]_{222}$ | $f_H$ (%) |
|----------------------------------------------------------|------------------|-----------|
| PMBLG-OEG <sub>7</sub>                                   | -32,411          | 91        |
| PMBLG-OEG <sub>7</sub> /C <sub>4</sub> -Br               | -20,800          | 61        |
| PMBLG-OEG <sub>7</sub> /C <sub>6</sub> -Br               | -16,981          | 51        |
| PMBLG-OEG <sub>7</sub> /C <sub>12</sub> -Br              | -14,018          | 44        |
| PMBLG-OEG <sub>7</sub> /C <sub>4</sub> -BF <sub>4</sub>  | -23,177          | 67        |
| PMBLG-OEG <sub>7</sub> /C <sub>6</sub> -BF <sub>4</sub>  | -18,005          | 54        |
| PMBLG-OEG <sub>7</sub> /C <sub>12</sub> -BF <sub>4</sub> | -14,987          | 46        |

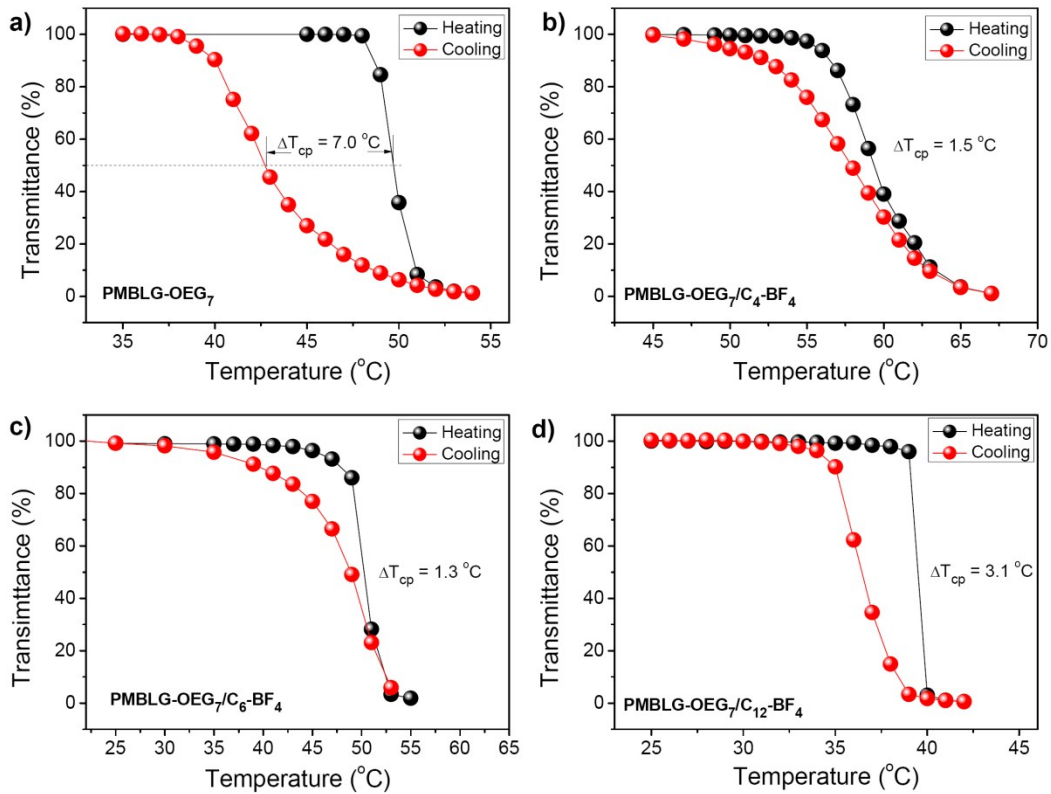

**Figure S3.** The plots of transmittance at  $\lambda = 500$  nm versus temperature for the aqueous solutions of (a) PMBLG-OEG<sub>7</sub> and (b-d) PMBLG-OEG<sub>7</sub>/C<sub>m</sub>-BF<sub>4</sub> ( $m = 4, 6,$  and  $12$ ) in DI-H<sub>2</sub>O (polymer concentration =  $10 \text{ mg}\cdot\text{mL}^{-1}$ ).

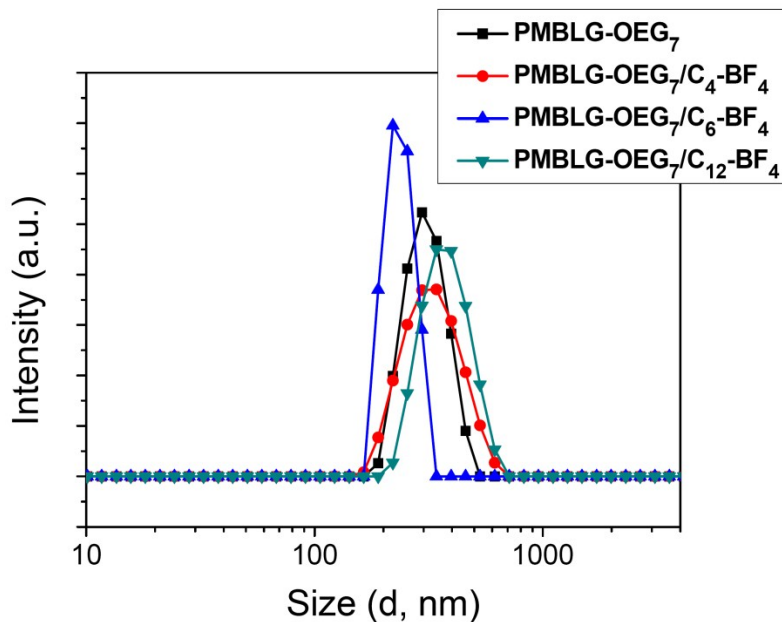

**Figure S4.** DLS size distribution plots of PMBLG-OEG<sub>7</sub> and PMBLG-OEG<sub>7</sub>/C<sub>m</sub>-BF<sub>4</sub> ( $m = 4, 6,$  and  $12$ ) at the temperatures above respective  $T_{cp}$ s. (polymer concentration =  $1 \text{ mg}\cdot\text{mL}^{-1}$ )

Table S4. DLS results of resulting polypeptides in DI-H<sub>2</sub>O above respective T<sub>cp</sub> (polymer concentration = 1 mg·mL<sup>-1</sup>).

| Name                                                     | Diameter (nm) | PDI <sup>a</sup> |
|----------------------------------------------------------|---------------|------------------|
| PMBLG-OEG <sub>7</sub>                                   | 331.7         | 0.183            |
| PMBLG-OEG <sub>7</sub> /C <sub>4</sub> -BF <sub>4</sub>  | 290.3         | 0.378            |
| PMBLG-OEG <sub>7</sub> /C <sub>6</sub> -BF <sub>4</sub>  | 221.3         | 0.109            |
| PMBLG-OEG <sub>7</sub> /C <sub>12</sub> -BF <sub>4</sub> | 349.6         | 0.201            |

<sup>a</sup> Distribution of polymer aggregates in the solvents.

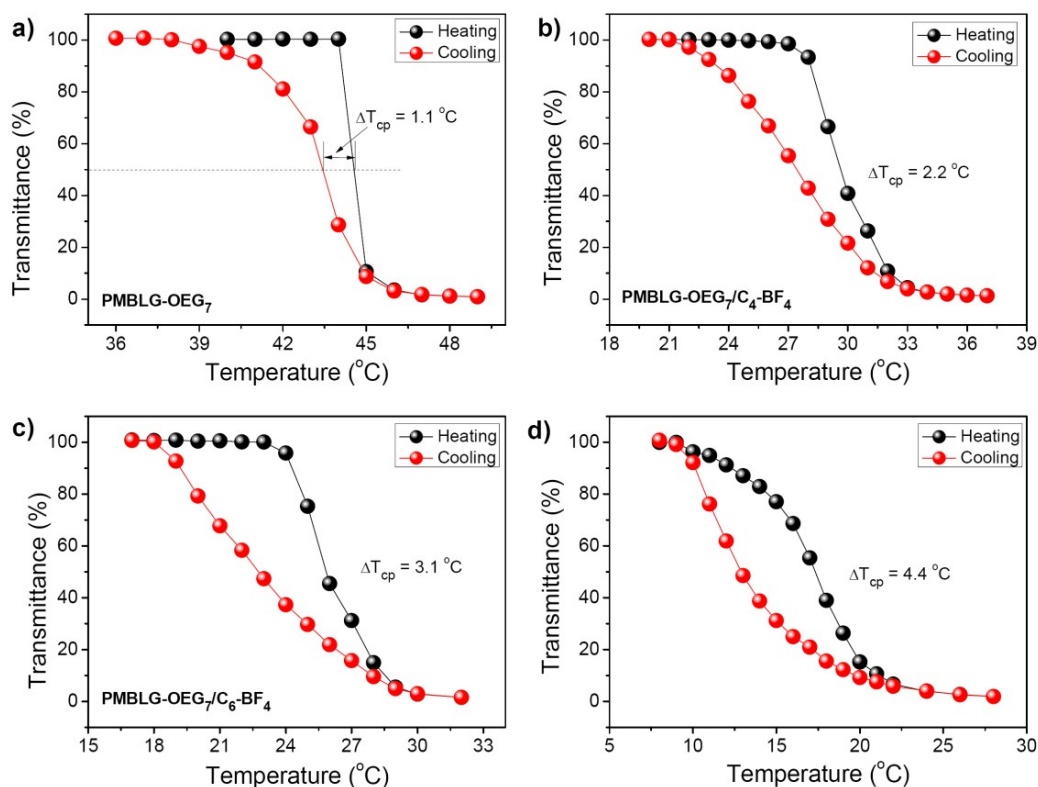

Figure S5. The plots of transmittance at  $\lambda = 500$  nm versus temperature for the NaBF<sub>4</sub> aqueous solutions (salt concentration = 5 mg·mL<sup>-1</sup>) of (a) PMBLG-OEG<sub>7</sub> and (b-d) PMBLG-OEG<sub>7</sub>/C<sub>m</sub>-BF<sub>4</sub> (m = 4, 6, and 12) (polymer concentration = 5 mg·mL<sup>-1</sup>).

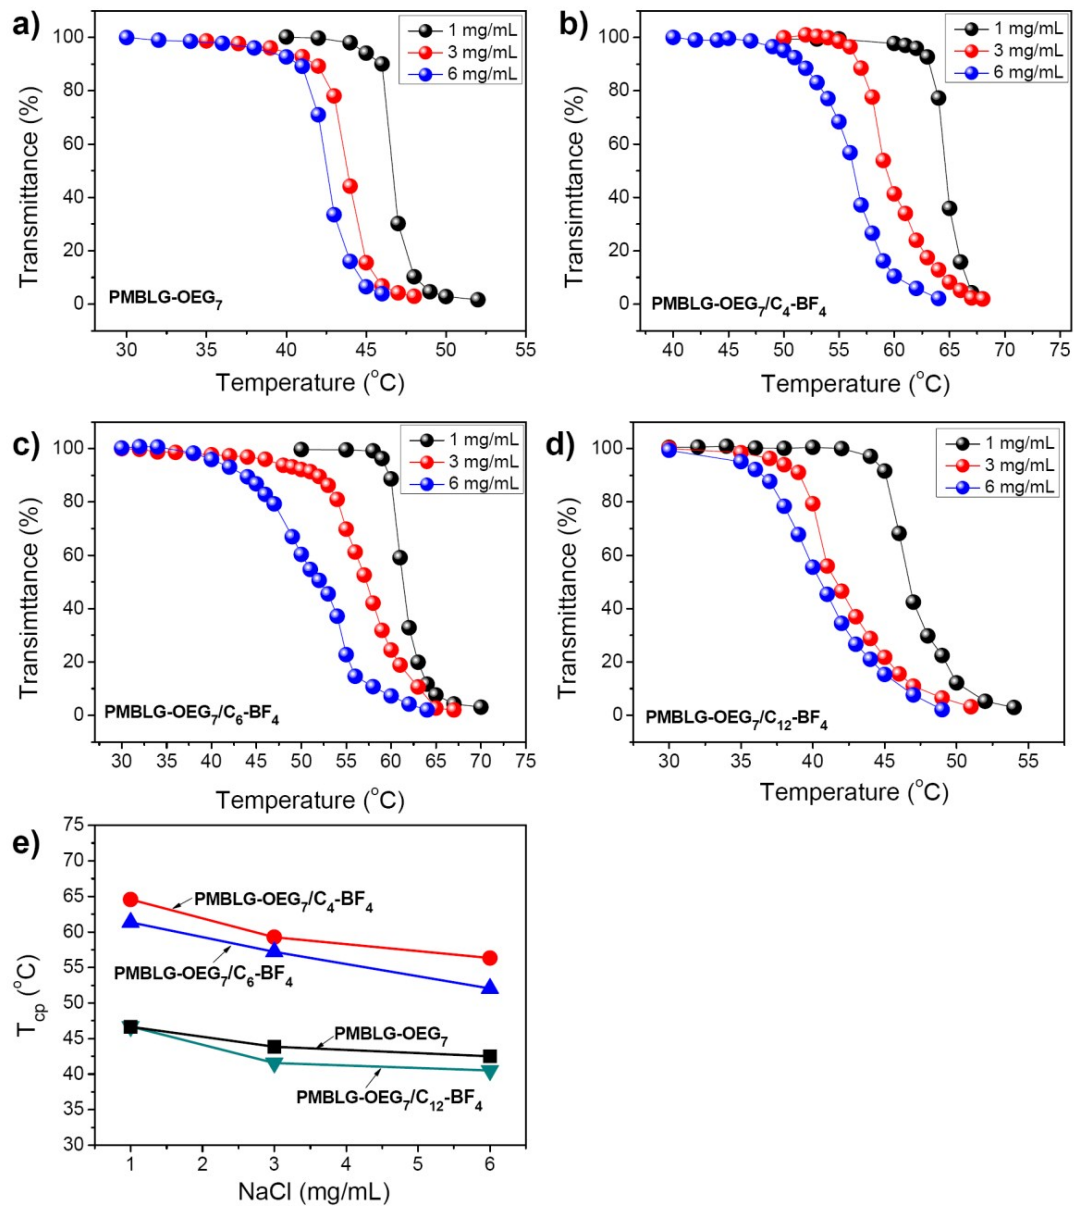

**Figure S6.** The plots of transmittance at  $\lambda = 500$  nm versus temperature for the NaCl aqueous solutions of (a) PMBLG-OEG<sub>7</sub> and (b-d) PMBLG-OEG<sub>7</sub>/C<sub>m</sub>-BF<sub>4</sub> ( $m = 4, 6,$  and  $12$ ) (salt concentration =  $1, 3, 6$  mg·mL<sup>-1</sup>). (e) The plots of  $T_{cp}$  versus concentrations in NaBF<sub>4</sub> aqueous solution (polymer concentration =  $5$  mg·mL<sup>-1</sup>).

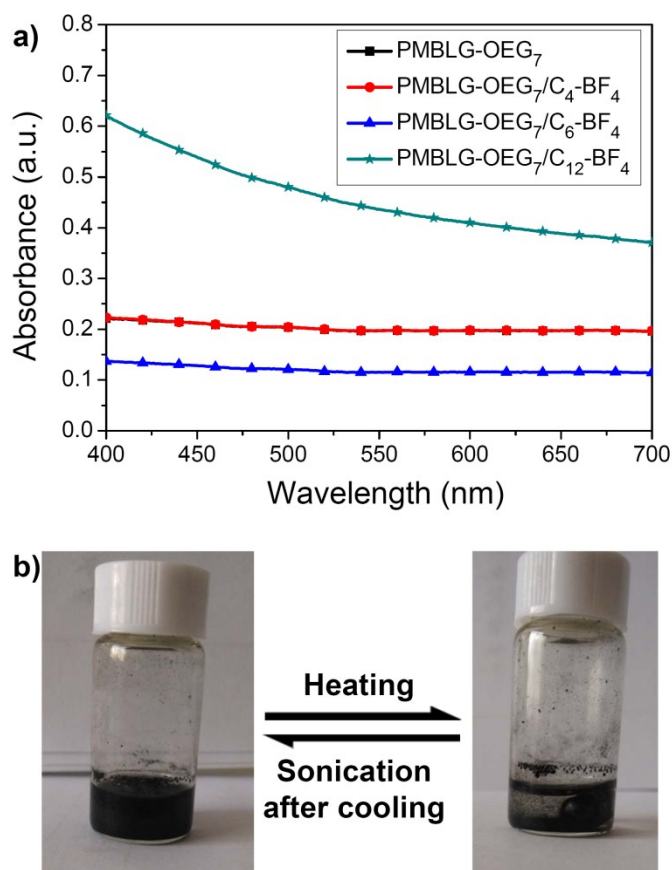

**Figure S7.** (a) UV-vis spectra of polymer/SWCNT/NaCl aqueous solutions (polymers: PMBLG-OEG<sub>7</sub> and PMBLG-OEG<sub>7</sub>/C<sub>m</sub>-BF<sub>4</sub>, salt concentration = 6 mg·mL<sup>-1</sup>, the solutions were diluted 10 times before UV-vis measurement). (b) Optical images of PMBLG-OEG<sub>7</sub>/C<sub>12</sub>-BF<sub>4</sub>/SWCNT/NaCl aqueous solution at room temperature (left) and temperature above the T<sub>cp</sub> (right).

*Table S5.* SWCNT dispersibility in NaCl aqueous solution (salt concentration = 6 mg·mL<sup>-1</sup>) in the presence of PMBLG-OEG<sub>7</sub> and PMBLG-OEG<sub>7</sub>/C<sub>m</sub>-BF<sub>4</sub> (m = 4, 6, and 12).

| Samples                                              | PMBLG-OEG <sub>7</sub> |                    | PMBLG-OEG <sub>7</sub> /C <sub>4</sub> -BF <sub>4</sub> |                    | PMBLG-OEG <sub>7</sub> /C <sub>6</sub> -BF <sub>4</sub> |                    | PMBLG-OEG <sub>7</sub> /C <sub>12</sub> -BF <sub>4</sub> |                    |
|------------------------------------------------------|------------------------|--------------------|---------------------------------------------------------|--------------------|---------------------------------------------------------|--------------------|----------------------------------------------------------|--------------------|
|                                                      | DI-H <sub>2</sub> O    | NaCl <sub>aq</sub> | DI-H <sub>2</sub> O                                     | NaCl <sub>aq</sub> | DI-H <sub>2</sub> O                                     | NaCl <sub>aq</sub> | DI-H <sub>2</sub> O                                      | NaCl <sub>aq</sub> |
| [A] <sub>500</sub> <sup>a</sup>                      | 0.045                  | 0.204              | 0.003                                                   | 0.205              | 0.003                                                   | 0.121              | 0.003                                                    | 0.480              |
| Dispersibility <sup>b</sup><br>(mg·L <sup>-1</sup> ) | 32.6                   | 147.8              | 2.2                                                     | 148.6              | 2.2                                                     | 87.7               | 2.2                                                      | 347.8              |

<sup>a</sup>The absorbance at 500 nm which was determined by UV-vis spectroscopy. Polymer aqueous solutions were diluted 10 times before UV-vis measurement.

<sup>b</sup>Dispersibility = 10 × [A]<sub>500</sub>/0.0138.<sup>1</sup>
